# Supplementary material
Source: PubMed Central journal article supplement (PMC2754599)
Supplement: NIHMS145869-supplement-01.pdf [file NIHMS145869-supplement-01.pdf]

**Supplemental Figure.** Relationships between each polymorphism and plasma efavirenz concentrations. Horizontal lines represent medians. Markers in each panel represent geometric means of paired efavirenz concentrations from each participant.

Type of file: table

Label: Supplemental Table

Filename: Revised\_Final\_Supplemental\_Table.doc

**Supplemental Table.** Positions, frequencies, and associations between efavirenz concentrations and each polymorphism assayed in *CYP2A6*, *CYP2B6*, *ABCB1*, *CYP3A5* and *CYP3A4*.

| Polymorphism  | gene position       | Chromosome position <sup>a</sup> | LD with 516G→T ( $r^2$ ) <sup>b</sup> | LD with rs36118214 ( $r^2$ ) <sup>b</sup> | MAF <sup>c</sup> |    | Efavirenz (ng/mL), median [IQR] |    | Efavirenz (ng/mL), median [IQR] |    | Efavirenz (ng/mL), median [IQR] | rho     | P-value              |
|---------------|---------------------|----------------------------------|---------------------------------------|-------------------------------------------|------------------|----|---------------------------------|----|---------------------------------|----|---------------------------------|---------|----------------------|
| <b>CYP2A6</b> |                     |                                  |                                       |                                           |                  |    |                                 |    |                                 |    |                                 |         |                      |
| rs28399433    | Promoter            | 46048219                         | 0.124                                 | 0.020                                     | 0.09             | GG | -                               | GT | 6073 [4170-7993]                | TT | 3066 [2307-5714]                | -0.3494 | 0.0187               |
| <b>CYP2B6</b> |                     |                                  |                                       |                                           |                  |    |                                 |    |                                 |    |                                 |         |                      |
| rs10411962    | up-UTR <sup>d</sup> | 46144052                         | 0.004                                 | 0.143                                     | 0.16             | AA | 6402 [1194-11610]               | AG | 3143 [1782-4067]                | GG | 3305 [2502-6815]                | 0.0977  | 0.5230               |
| rs8109818     | up-UTR              | 46152461                         | 0.266                                 | 0.443                                     | 0.30             | AA | 4170 [3294-7738]                | AG | 2963 [1772-4779]                | GG | 2725 [1893-3379]                | -0.4218 | 0.0039               |
| rs11671108    | up-UTR              | 46173813                         | 0                                     | 0.010                                     | 0.07             | AA | 3294 [2409-6815]                | AC | 3514 [2779-4664]                | CC | 2497 [2497- 2497]               | -0.0592 | 0.6992               |
| rs7251950     | up-UTR              | 46174582                         | 0.007                                 | 0.001                                     | 0.07             | CC | 3295 [2435-6914]                | CT | 3153 [2307-3614]                | TT | -                               | -0.0956 | 0.5320               |
| rs8105382     | up-UTR              | 46180624                         | 0.320                                 | 0.115                                     | 0.29             | CC | 2435 [1762-2813]                | CT | 3041 [2307-4067]                | TT | 4170 [3092-7681]                | 0.3578  | 0.0158               |
| rs11083595    | up-UTR              | 46180844                         | 0.786                                 | 0.183                                     | 0.45             | CC | 8228 [6715-14829]               | CG | 3652 [3034-6473]                | GG | 2345 [1402-2691]                | -0.6041 | <0.0001 <sup>f</sup> |
| rs1808682     | up-UTR              | 46181288                         | 0.001                                 | 0                                         | 0.05             | AA | -                               | AG | 3514 [2779-4664]                | GG | 3219 [2409-6815]                | 0.0005  | 0.9680               |
| rs892216      | up-UTR              | 46181691                         | 0.710                                 | 0.276                                     | 0.47             | CC | 1762 [1327-2435]                | CT | 3652 [3034-6473]                | TT | 7738 [3092-14829]               | 0.6065  | <0.0001 <sup>f</sup> |
| rs10418990    | up-UTR              | 46182244                         | 0.017                                 | 0.007                                     | 0.02             | CC | 3315 [2383-6715]                | CG | 2830 [2569-3092]                | GG | -                               | -0.0996 | 0.5149               |
| rs7259758     | up-UTR              | 46182927                         | 0.102                                 | 0.043                                     | 0.11             | GG | 3365 [2307-6715]                | GT | 3053 [2684-5491]                | TT | 2435 [2435-2435]                | -0.0996 | 0.5990               |
| rs10419125    | up-UTR              | 46183720                         | 0.059                                 | 0.014                                     | 0.04             | CC | 3143 [2383-6473]                | CT | 3911 [3483-5926]                | TT | -                               | 0.1623  | 0.2867               |
| rs8109525     | up-UTR              | 46183758                         | 0.007                                 | 0.038                                     | 0.11             | AA | 3143 [2383-6914]                | AG | 3514 [2892-4170]                | GG | -                               | 0.0329  | 0.8300               |
| rs7254579     | up-UTR              | 46186731                         | 0.007                                 | 0.038                                     | 0.11             | CC | -                               | CT | 3514 [2892-4170]                | TT | 3143 [2383-6914]                | -0.0329 | 0.8300               |
| rs1962261     | up-UTR              | 46187079                         | 0.115                                 | 0.047                                     | 0.13             | AA | 2624 [2435-2813]                | AG | 3046 [2476-5491]                | GG | 3415 [2307-6715]                | 0.1259  | 0.4097               |
| rs3760657     | up-UTR              | 46187273                         | 0.017                                 | 0                                         | 0.02             | AA | 3315 [2435-6715]                | AG | 2600 [2307-2892]                | GG | -                               | -0.1578 | 0.3007               |
| rs12721652    | up-UTR              | 46187473                         | 0.372                                 | 0.240                                     | 0.33             | CC | 3911 [3063-7709]                | CT | 3218 [2440-6016]                | TT | 1762 [1326-2435]                | -0.3917 | 0.0078               |
| rs2054675     | up-UTR              | 46187595                         | 0.831                                 | 0.194                                     | 0.46             | CC | 8718 [6715-14829]               | CT | 3533 [3034-6073]                | TT | 2345 [1402-2691]                | -0.6338 | <0.0001 <sup>f</sup> |

|            |                    |          |       |       |      |    |                   |    |                   |    |                   |         |                      |
|------------|--------------------|----------|-------|-------|------|----|-------------------|----|-------------------|----|-------------------|---------|----------------------|
| rs4802100  | up-UTR             | 46187865 | 0.017 | 0     | 0.02 | CC | 3315 [2435-6715]  | CG | 2600 [2307-2892]  | GG | -                 | -0.1578 | 0.3007               |
| rs4802101  | up-UTR             | 46188301 | 0.017 | 0.007 | 0.02 | CC | 3315 [2383-6715]  | CT | 2830 [2569-3092]  | TT | -                 | -0.0996 | 0.5149               |
| rs28723610 | up-UTR             | 46188665 | 0.059 | 0.014 | 0.04 | AA | -                 | AG | 3911 [3483-5926]  | GG | 3143 [2383-6473]  | -0.1623 | 0.2867               |
| rs34223104 | up-UTR             | 46188969 | 0.044 | 0.033 | 0.05 | CC | 1145 [1145-1145]  | CT | 3034 [1478-3295]  | TT | 3415 [2497-2496]  | 0.2697  | 0.0732               |
| rs28739581 | intron             | 46189415 | 0.380 | 0.257 | 0.32 | AA | 1762 [1327-2435]  | AT | 3294 [2497-6473]  | TT | 3911 [3063-7709]  | 0.3807  | 0.0108               |
| rs2099361  | intron             | 46190188 | 0.017 | 0.007 | 0.02 | GG | -                 | GT | 2830 [2569-3092]  | TT | 3315 [2383-6715]  | 0.0996  | 0.5149               |
| rs8100458  | intron             | 46192053 | 0.029 | 0.079 | 0.10 | CC | -                 | CT | 2892 [2142-3614]  | TT | 3305 [2533-7225]  | 0.2224  | 0.1419               |
| rs7250873  | intron             | 46195462 | 0.656 | 0.086 | 0.49 | AA | 2409 [1762-2813]  | AG | 3652 [2891-6073]  | GG | 7227 [3034-13528] | 0.4389  | 0.0026               |
| rs3786547  | intron             | 46198031 | 0.831 | 0.194 | 0.46 | CC | 8718 [6715-14829] | CT | 3533 [3034-6073]  | TT | 2345 [1402-2691]  | -0.6338 | <0.0001 <sup>f</sup> |
| rs4803417  | intron             | 46199860 | 0.127 | 0.052 | 0.14 | AA | 3514 [2307-6715]  | AC | 3092 [2799-4067]  | CC | 2502 [2435-2569]  | -0.1366 | 0.3709               |
| rs1987236  | intron             | 46200873 | 0.187 | 0.076 | 0.20 | AA | 3633 [2307-7536]  | AG | 3218 [2806-5070]  | GG | 2435 [2383-2569]  | -0.1853 | 0.2229               |
| rs35490259 | intron             | 46201012 | 0.174 | 0.500 | 0.19 | CC | -                 | CT | 2497 [1762-3614]  | TT | 3859 [2963-7298]  | 0.3706  | 0.0122               |
| rs1872121  | intron             | 46202502 | 0.228 | 0.941 | 0.23 | AA | 1402 [750-1565]   | AG | 3041 [2307-5558]  | GG | 3826 [2853-7298]  | 0.4144  | 0.0047               |
| rs4803419  | intron             | 46204632 | 0.054 | 0.001 | 0.07 | CC | 3315 [2497-6914]  | CT | 2637 [2307-3614]  | TT | -                 | -0.1611 | 0.2905               |
| rs3745274  | 516G→T<br>(exon 4) | 46204681 | -     | 0.242 | 0.44 | GG | 2142 [1478-2569]  | GT | 3826 [3092-6473]  | TT | 8228 [6214-14178] | 0.7242  | <0.0001 <sup>f</sup> |
| rs10401737 | intron             | 46206263 | 0.592 | 0.264 | 0.44 | CC | 7198 [3911-11123] | CT | 3118 [2569-5558]  | TT | 1762 [1478-2307]  | -0.5913 | <0.0001 <sup>f</sup> |
| rs2279343  | 785A→G<br>(exon 5) | 46207103 | 0.957 | 0.231 | 0.42 | AA | 2225 [1565-2691]  | AG | 4000 [3092-6473]  | GG | 8228 [6214-14178] | 0.7141  | <0.0001 <sup>f</sup> |
| rs2279344  | intron             | 46207323 | 0.127 | 0.052 | 0.14 | AA | 3514 [2307-6715]  | AG | 3092 [2799-4067]  | GG | 2502 [2435-2569]  | -0.1366 | 0.3709               |
| rs2279345  | intron             | 46207542 | 0.228 | 0.093 | 0.23 | CC | 3614 [2307-7536]  | CT | 3315 [2383-4170]  | TT | 2569 [2435-2813]  | -0.1587 | 0.2978               |
| rs12721649 | intron             | 46207677 | 0.165 | 0.668 | 0.18 | AA | -                 | AG | 2225 [1565-3379]  | GG | 4033 [2963-7298]  | 0.4461  | 0.0024               |
| rs6508965  | intron             | 46209528 | 0.228 | 0.093 | 0.23 | CC | 3614 [2307-7536]  | CT | 3315 [2383-4170]  | TT | 2569 [2435-2813]  | -0.1587 | 0.2978               |
| rs7246456  | intron             | 46209918 | 0.957 | 0.231 | 0.42 | CC | 2142 [1478-2569]  | CT | 4000 [3092-6914]  | TT | 7738 [5714-14829] | 0.7012  | <0.0001 <sup>f</sup> |
| rs28399499 | 983T→C<br>(exon 7) | 46210061 | 0.026 | 0.107 | 0.03 | CC | -                 | CT | 6473 [3143-11610] | TT | 3294 [2383-6073]  | -0.1921 | 0.2062               |
| rs8192719  | intron             | 46210613 | 0.957 | 0.231 | 0.42 | CC | 2142 [1478-2569]  | CT | 4000 [3092-6914]  | TT | 7738 [5714-14829] | 0.7012  | <0.0001 <sup>f</sup> |
| rs36118214 | intron             | 46211146 | 0.242 | -     | 0.24 | AA | 1402 [750-1565]   | AG | 3037 [2142-5558]  | GG | 4000 [2892-7681]  | 0.4803  | 0.0008 <sup>f</sup>  |

|                      |                     |          |       |       |      |     |                  |     |                  |     |                   |         |                      |
|----------------------|---------------------|----------|-------|-------|------|-----|------------------|-----|------------------|-----|-------------------|---------|----------------------|
| rs33967301           | intron              | 46211408 | 0.017 | 0     | 0.02 | CC  | -                | CT  | 3572 [3143-4000] | TT  | 3295 [2383-6715]  | -0.0249 | 0.871                |
| rs11671243           | intron              | 46211555 | 0.228 | 0.093 | 0.23 | AA  | 2569 [2435-2813] | AC  | 3314 [2383-4170] | CC  | 3614 [2307-7536]  | 0.1587  | 0.2978               |
| rs10853744           | intron              | 46213779 | 0.956 | 0.236 | 0.42 | GG  | 2142 [1478-2569] | GT  | 4033 [3092-6914] | TT  | 7738 [5714-14829] | 0.7019  | <0.0001 <sup>f</sup> |
| rs7260525            | dn-UTR <sup>e</sup> | 46215094 | 0.017 | 0.071 | 0.02 | AA  | 3295 [2435-6715] | AG  | 2878 [2142-3614] | GG  | -                 | -0.0913 | 0.5507               |
| rs7246465            | dn-UTR              | 46215143 | 0.032 | 0.112 | 0.25 | CC  | 3826 [2799-7536] | CT  | 2813 [1478-3614] | TT  | 4808 [2169-9042]  | -0.281  | 0.0615               |
| rs34128717           | dn-UTR              | 46215592 | 0.100 | 0.040 | 0.11 | AA  | 3415 [2307-6715] | AG  | 3053 [2684-5491] | GG  | 2435 [2435-2435]  | -0.1090 | 0.4812               |
| rs34789700           | dn-UTR              | 46216573 | 0.123 | 0.050 | 0.13 | GG  | 3365 [2225-6394] | GT  | 3218 [2684-6694] | TT  | -                 | 0.0118  | 0.9396               |
| rs1552222            | dn-UTR              | 46217744 | 0.025 | 0.004 | 0.26 | AA  | 3605 [2435-6473] | AT  | 2806 [2263-5264] | TT  | 3415 [2497-6715]  | 0.0989  | 0.5182               |
| Composite<br>516/983 |                     |          |       |       |      | EXT | 1962 [1478-2435] | INT | 3415 [3092-5558] | SLO | 8228 [6473-13528] | 0.7578  | <0.0001 <sup>f</sup> |
| <b>ABCB1</b>         |                     |          |       |       |      |     |                  |     |                  |     |                   |         |                      |
| rs1045642            | 3435C→T             | 86976581 |       |       | 0.17 | CC  | 3295 [2307-6073] | CT  | 3315 [3092-6914] | TT  | 3143 [1194-7681]  | 0.0895  | 0.5589               |
| rs2032582            | 2677G→T             | 86998554 |       |       | 0.06 | GG  | 3143 [2307-6073] | GT  | 3614 [3315-6914] | TT  | -                 | 0.1396  | 0.3660               |
| rs1128503            | 1236C→T             | 87017537 |       |       | 0.16 | CC  | 3415 [2307-6715] | CT  | 3218 [3034-6473] | TT  | -                 | 0.0037  | 0.9808               |
| <b>CYP3A5</b>        |                     |          |       |       |      |     |                  |     |                  |     |                   |         |                      |
| rs776746             | 6986A→G             | 87017537 |       |       | 0.20 | AA  | 3193 [2307-6073] | AG  | 4085 [2805-7225] | GG  | 3652 [3034-8718]  | 0.1975  | 0.1934               |
| <b>CYP3A4</b>        |                     |          |       |       |      |     |                  |     |                  |     |                   |         |                      |
| rs2740574            | -392A→G             | 99108475 |       |       | 0.22 | AA  | 4064 [2569-5558] | AG  | 3118 [1772-5542] | GG  | 3315 [2497-6715]  | 0.0969  | 0.5265               |

<sup>a</sup> Positions map to genome build 36.3.

<sup>a</sup> Linkage disequilibrium (LD)  $r^2$  values were generated using Haploview [23].

<sup>c</sup> MAF indicates minor allele frequency.

<sup>d</sup> up-UTR indicates upstream untranslated region.

<sup>e</sup> dn-UTR indicates downstream untranslated region.

<sup>f</sup> These P values are significant after Bonferroni correction for multiple comparisons.
